# Supplementary material
Source: MDPI journal article supplement (https://www.mdpi.com/2227-9717/9/10/1699)
Supplement: s1 [file s1]

## SUPPORTING INFORMATION

### Hg<sup>2+</sup> detection with rational design of DNA-templated fluorescent silver nanoclusters.

Liam Yourston<sup>1</sup>, Polikron Dhoqina<sup>2</sup>, Nolan Marshall<sup>1</sup>, Rujani Mahmud<sup>1</sup>, Ethen Kuether<sup>1</sup>, Alexey V. Krasnoslobodtsev<sup>1\*</sup>

<sup>1</sup>Department of Physics, University of Nebraska at Omaha, Omaha, NE 68182, USA

<sup>2</sup>Department of Physics, Faculty of Natural Sciences, University of Tirana, Tirana 1001, Albania

### SEQUENCES USED IN THIS PROJECT

All oligonucleotides were purchased from IDT, Inc. Names denote the numbers of cytosines and thymines in each hairpin loop, underlined below.

HL-C<sub>7</sub>: 5'- TATCCGTCCCCCCCCACGGATA  
 HL-C<sub>9</sub>: 5'- TATCCGTCCCCCCCCACGGATA  
 HL-C<sub>11</sub>: 5'- TATCCGTCCCCCCCCACGGATA  
 HL-C<sub>13</sub> (HL-T<sub>0</sub>C<sub>13</sub>): 5'- TATCCGTCCCCCCCCACGGATA  
 HL-C<sub>15</sub>: 5'- TATCCGTCCCCCCCCACGGATA  
 HL-C<sub>17</sub>: 5'- TATCCGTCCCCCCCCACGGATA  
 HL-C<sub>19</sub>: 5'- TATCCGTCCCCCCCCACGGATA  
 HL-T<sub>2</sub>C<sub>11</sub>: 5'- TATCCGTTTCCCCCCCCCTACGGATA  
 HL-T<sub>4</sub>C<sub>9</sub>: 5'- TATCCGTTTCCCCCCCCCTTACGGATA  
 HL-T<sub>6</sub>C<sub>7</sub>: 5'- TATCCGTTTTCCCCCCTTTACGGATA

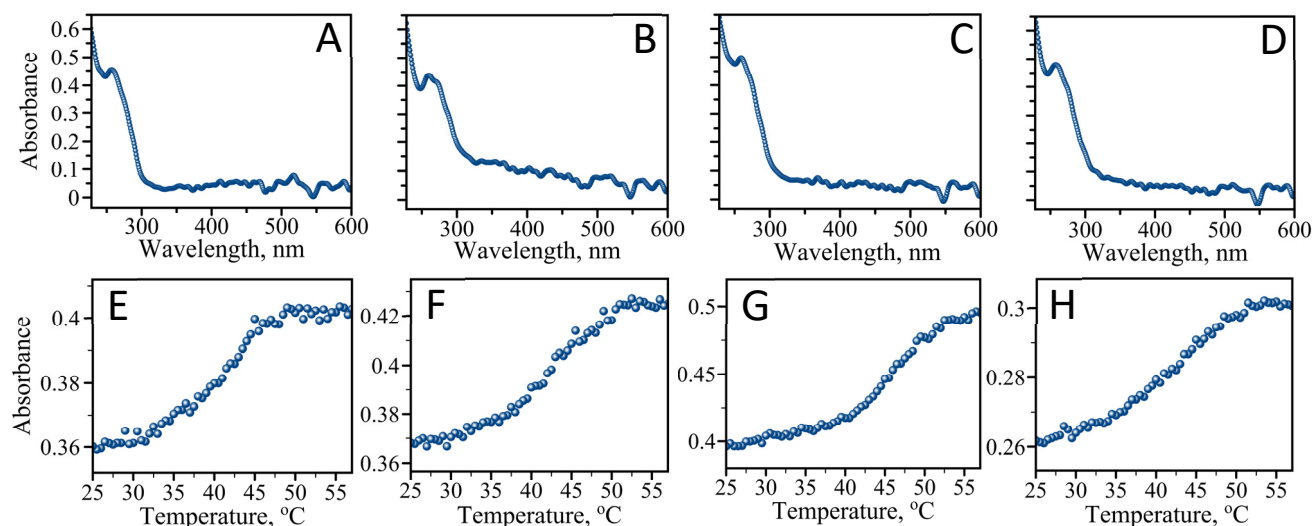

**SI Figure S1.** UV-vis characterization of AgNC@HL-T<sub>m</sub>C<sub>n</sub> designs. Top panel – UV-vis absorption spectra: A) AgNC@HL-T<sub>0</sub>C<sub>13</sub>, B) AgNC@HL-T<sub>2</sub>C<sub>11</sub>, C) AgNC@HL-T<sub>4</sub>C<sub>9</sub>, D) AgNC@HL-T<sub>6</sub>C<sub>7</sub>. Bottom panel – melting curves measured as change in A<sub>260</sub>: E) AgNC@HL-T<sub>0</sub>C<sub>13</sub>, F) AgNC@HL-T<sub>2</sub>C<sub>11</sub>, G) AgNC@HL-T<sub>4</sub>C<sub>9</sub>, H) AgNC@HL-T<sub>6</sub>C<sub>7</sub>.

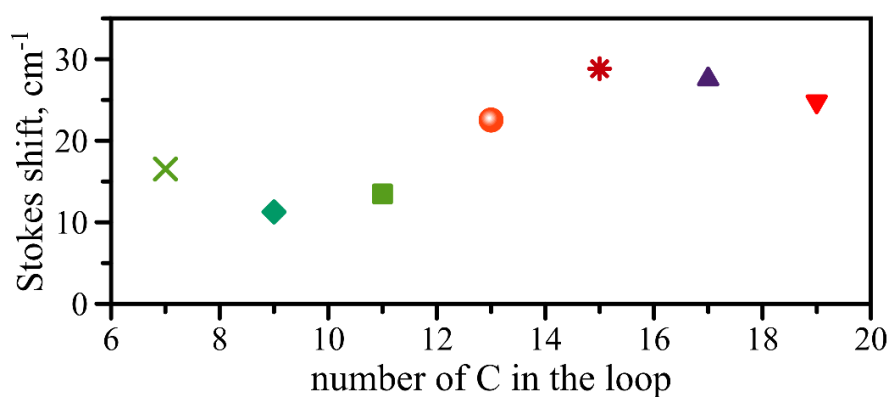

**SI Figure S2.** The trend of Stokes shift expressed in units of energy, cm<sup>-1</sup>.

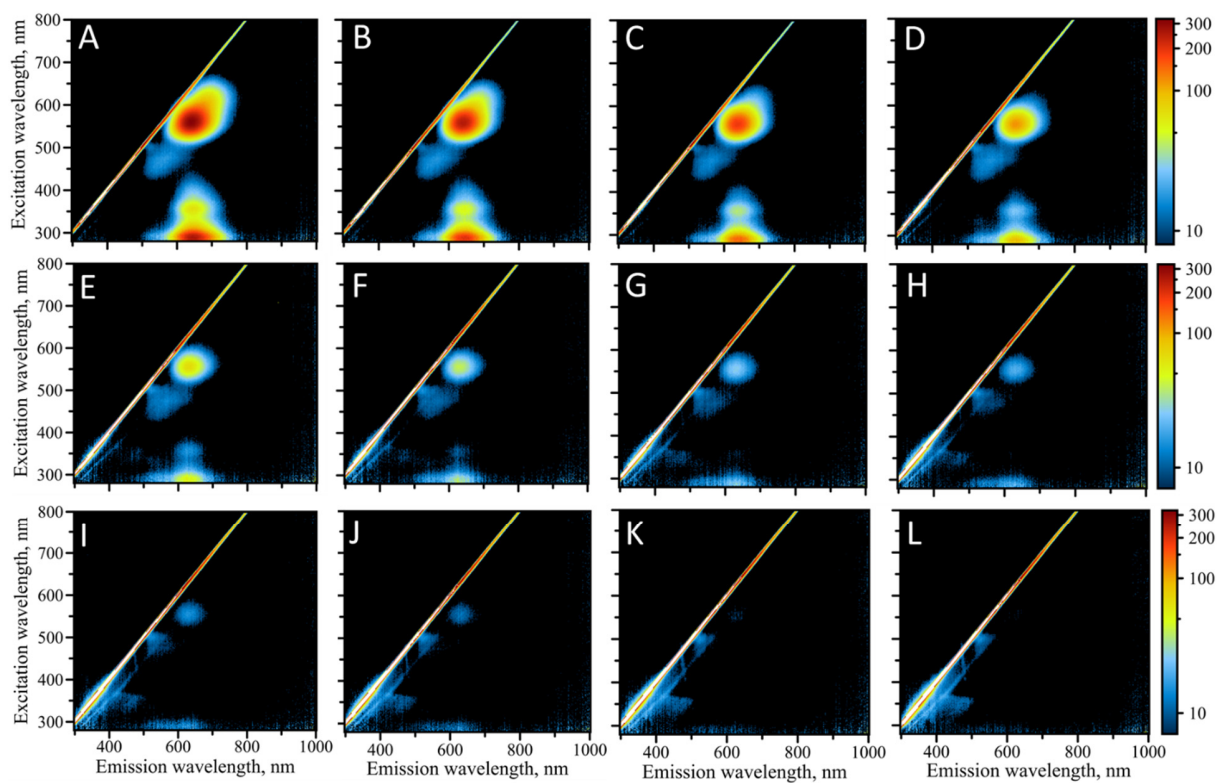

**SI Figure S3.** Titration of AgNCs@HL-C<sub>13</sub> with different ratios of C<sub>AgNC</sub>/C<sub>Hg2+</sub>. A) 1/0, B) 1/0.076, C) 1/0.15, D) 1/0.23, E) 1/0.38, F) 1/0.46, G) 1/0.54, H) 1/0.69, I) 1/0.77, J) 1/0.85, K) 1/0.92, L) 1/1. C<sub>AgNC@HL-C13</sub> was kept the same at 6.2 μM.

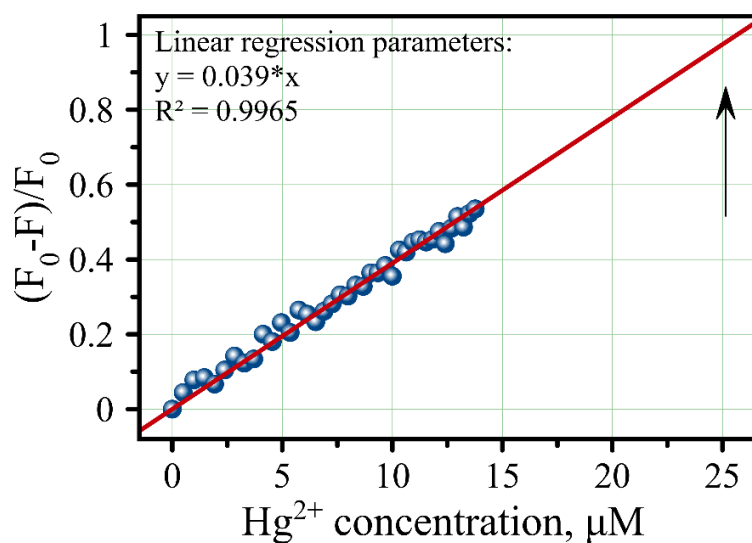

**SI Figure S4.** Linear regression analysis of quenching data points for AgNC@HL-T<sub>6</sub>C<sub>7</sub>. The plot represents the best fit with  $R^2=0.9965$ , intercept 0 and slope of 0.039. Red line was also extrapolated to  $(F_0-F)/F_0 = 1$  where complete quenching is expected to occur, thus setting up the upper limit of monitorable  $\text{Hg}^{2+}$  concentration.

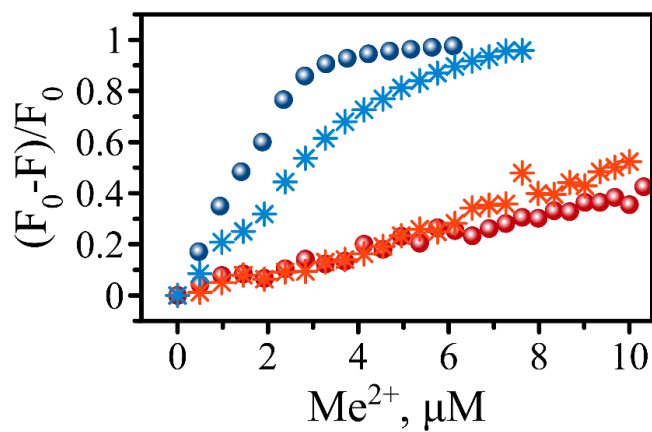

**SI Figure S5.** Comparative graph of quenching data points for AgNC@HL-T<sub>0</sub>C<sub>13</sub> (blue) and AgNC@HL-T<sub>6</sub>C<sub>7</sub> (red). Circles represent data points obtained for quenching with  $\text{Hg}^{2+}$  and stars represent data points obtained for quenching with  $\text{Cu}^{2+}$ .
